# Supplementary material
Source: ML conference proceedings conference paper supplement (https://proceedings.mlr.press/v108/kim20e.html)
Supplement: Supplementary file [file kim20e-supp.pdf]

## A Supplementary Material

In the proofs below, for  $\alpha, \beta \geq 0$ , we let  $Y_t(A, \beta)$  and  $Z_t(A, \beta)$  be matrix polynomials such that

$$Y_t(A, \beta) = 2AY_{t-1}(A, \beta) - \beta Y_{t-2}(A, \beta), \quad t \geq 2, \quad Y_1(A, \beta) = A, \quad Y_0(A, \beta) = I, \quad (20)$$

$$Z_t(A, \beta) = 2AZ_{t-1}(A, \beta) - \beta Z_{t-2}(A, \beta), \quad t \geq 2, \quad Z_1(A, \beta) = 2A, \quad Z_0(A, \beta) = I. \quad (21)$$

and let  $y_t(\alpha, \beta)$  and  $z_t(\alpha, \beta)$  be recurrence polynomials such that

$$y_t(\alpha, \beta) = \sqrt{\alpha}y_{t-1}(\alpha, \beta) - \beta y_{t-2}(\alpha, \beta), \quad t \geq 2, \quad y_1(\alpha, \beta) = \frac{\sqrt{\alpha}}{2}, \quad y_0(\alpha, \beta) = 1, \quad (22)$$

$$z_t(\alpha, \beta) = \sqrt{\alpha}z_{t-1}(\alpha, \beta) - \beta z_{t-2}(\alpha, \beta), \quad t \geq 2, \quad z_1(\alpha, \beta) = \sqrt{\alpha}, \quad z_0(\alpha, \beta) = 1. \quad (23)$$

For a sequence of matrices  $B_0, B_1, B_2, \dots$ , let

$$\prod_{i=j}^k B_i = \begin{cases} B_j B_{j-1} \cdots B_k & \text{if } j \geq k \\ I, & \text{otherwise} \end{cases}.$$

Since the eigenvectors  $u_1, u_2, \dots, u_d$  form an orthogonal basis, we frequently use the fact that for  $w \in \mathbb{R}^d$ , we have  $\|w\|^2 = \sum_{k=1}^d (u_k^T w)^2$ .

### A.1 Main Results

**Lemma A.1.** For  $w_0 \in \mathbb{R}^d$ , let  $w = w_0/\|w_0\|$ . Then, for  $t \geq 0$ , we have

$$\|P[(1-\eta)I + \eta C]^t w\|^2 \leq 2(1-\eta + \eta\lambda_1)^{2t}(1 - (u_1^T w)^2), \quad (24a)$$

$$\|PY_t((1-\eta)I + \eta C, \beta(\eta))w\|^2 \leq 4(1 - (u_1^T w)^2)p_t(\alpha_1(\eta), \beta(\eta)), \quad (24b)$$

$$\|Z_t((1-\eta)I + \eta C, \beta(\eta))\|^2 \leq q_t(\alpha_1(\eta), \beta(\eta)). \quad (24c)$$

*Proof.* Since  $u_1, u_2, \dots, u_d$  forms an orthogonal basis in  $\mathbb{R}^d$ , we can write  $w = \sum_{k=1}^d (u_k^T w)u_k$ . From that  $(\lambda_k, u_k)$  are eigenpairs of  $C$ , we have

$$[(1-\eta)I + \eta C]^t w = \sum_{k=1}^d (u_k^T w)(1-\eta + \eta\lambda_k)^t u_k. \quad (25)$$

From the definition of  $w$  and  $P$  in (6), we have  $P = I - ww^T$ . Since

$$\begin{aligned} \|P[(1-\eta)I + \eta C]^t w\|^2 &= w^T [(1-\eta)I + \eta C]^t P^2 [(1-\eta)I + \eta C]^t w \\ &= w^T [(1-\eta)I + \eta C]^t P [(1-\eta)I + \eta C]^t w \\ &= w^T [(1-\eta)I + \eta C]^t (I - ww^T) [(1-\eta)I + \eta C]^t w \\ &= \|[(1-\eta)I + \eta C]^t w\|^2 - (w^T [(1-\eta)I + \eta C]^t w)^2, \end{aligned}$$

using (25), we have

$$\begin{aligned} \|P[(1-\eta)I + \eta C]^t w\|^2 &= \sum_{k=1}^d (u_k^T w)^2 (1-\eta + \eta\lambda_k)^{2t} - \left( \sum_{k=1}^d (u_k^T w)^2 (1-\eta + \eta\lambda_k)^t \right)^2 \\ &\leq (1-\eta + \eta\lambda_1)^{2t} - (u_1^T w)^4 (1-\eta + \eta\lambda_1)^{2t} \\ &\leq 2(1 - (u_1^T w)^2)(1-\eta + \eta\lambda_1)^{2t} \end{aligned}$$

where the last inequality follows from

$$1 - (u_1^T w)^4 = (1 + (u_1^T w)^2)(1 - (u_1^T w)^2) \leq 2(1 - (u_1^T w)^2). \quad (26)$$

To prove (24b), we first show that

$$Y_t((1-\eta)I + \eta C, \beta(\eta))u_k = y_t(\alpha_k(\eta), \beta(\eta))u_k. \quad (27)$$

First, consider the cases when  $t = 0$  and  $t = 1$ . For  $t = 0$ , we have  $Y_0((1-\eta)I + \eta C, \beta(\eta))u_k = y_0(\alpha_k(\eta), \beta(\eta))u_k$ . For  $t = 1$ , it follows that

$$Y_1((1-\eta)I + \eta C, \beta(\eta))u_k = ((1-\eta)I + \eta C)u_k = (1-\eta + \eta\lambda_k)u_k = \frac{\sqrt{\alpha_k(\eta)}}{2}u_k = y_1(\alpha_k(\eta), \beta(\eta))u_k.$$

Suppose that (27) holds for  $t-1$  and  $t-2$ . Using the definition of  $Y_t$  in (20), we have

$$\begin{aligned} Y_t((1-\eta)I + \eta C, \beta(\eta))u_k &= [2((1-\eta)I + \eta C)Y_{t-1}((1-\eta)I + \eta C, \beta(\eta)) - \beta(\eta)Y_{t-2}((1-\eta)I + \eta C, \beta(\eta))]u_k \\ &= [2(1-\eta + \eta\lambda_k)y_{t-1}(\alpha_k(\eta), \beta(\eta)) - \beta(\eta)y_{t-2}(\alpha_k(\eta), \beta(\eta))]u_k \\ &= [\sqrt{\alpha_k(\eta)}y_{t-1}(\alpha_k(\eta), \beta(\eta)) - \beta(\eta)y_{t-2}(\alpha_k(\eta), \beta(\eta))]u_k \\ &= y_t(\alpha_k(\eta), \beta(\eta))u_k. \end{aligned}$$

This completes the proof of (27).

Next, we show that

$$(y_t(\alpha_k(\eta), \beta(\eta)))^2 = p_t(\alpha_k(\eta), \beta(\eta)). \quad (28)$$

For the base cases, we have

$$(y_0(\alpha_k(\eta), \beta(\eta)))^2 = 1 = p_0(\alpha_k(\eta), \beta(\eta)), \quad (y_1(\alpha_k(\eta), \beta(\eta)))^2 = \frac{\alpha_k}{4} = p_1(\alpha_k(\eta), \beta(\eta))$$

and

$$(y_2(\alpha_k(\eta), \beta(\eta)))^2 = \left( \sqrt{\alpha_k(\eta)}y_1(\alpha_k(\eta), \beta(\eta)) - \beta(\eta)y_0(\alpha_k(\eta), \beta(\eta)) \right)^2 = \left( \frac{\alpha(\eta)}{2} - \beta(\eta) \right)^2 = p_2(\alpha_k(\eta), \beta(\eta)).$$

Using the definition of  $y_t$  in (22) for  $t$  and  $t-1$ , we have

$$\begin{aligned} (y_t(\alpha_k(\eta), \beta(\eta)))^2 &= (\sqrt{\alpha_k(\eta)}y_{t-1}(\alpha_k(\eta), \beta(\eta)) - \beta(\eta)y_{t-2}(\alpha_k(\eta), \beta(\eta)))^2 \\ &= \alpha_k(\eta)(y_{t-1}(\alpha_k(\eta), \beta(\eta)))^2 - 2\sqrt{\alpha_k(\eta)}\beta(\eta)y_{t-1}(\alpha_k(\eta), \beta(\eta))y_{t-2}(\alpha_k(\eta), \beta(\eta)) \\ &\quad + \beta(\eta)^2(y_{t-2}(\alpha_k(\eta), \beta(\eta)))^2 \end{aligned}$$

and

$$\begin{aligned} (y_{t-1}(\alpha_k(\eta), \beta(\eta)))^2 &= \alpha_k(\eta)(y_{t-2}(\alpha_k(\eta), \beta(\eta)))^2 - 2\sqrt{\alpha_k(\eta)}\beta(\eta)y_{t-2}(\alpha_k(\eta), \beta(\eta))y_{t-3}(\alpha_k(\eta), \beta(\eta)) \\ &\quad + \beta(\eta)^2(y_{t-3}(\alpha_k(\eta), \beta(\eta)))^2. \end{aligned}$$

Moreover, since

$$y_{t-1}(\alpha_k(\eta), \beta(\eta))y_{t-2}(\alpha_k(\eta), \beta(\eta)) = \sqrt{\alpha_k(\eta)}(y_{t-2}(\alpha_k(\eta), \beta(\eta)))^2 - \beta(\eta)y_{t-2}(\alpha_k(\eta), \beta(\eta))y_{t-3}(\alpha_k(\eta), \beta(\eta)),$$

we have

$$\begin{aligned} (y_t(\alpha_k(\eta), \beta(\eta)))^2 &= \alpha_k(\eta)(y_{t-1}(\alpha_k(\eta), \beta(\eta)))^2 - 2\alpha_k(\eta)\beta(\eta)(y_{t-2}(\alpha_k(\eta), \beta(\eta)))^2 + \beta(\eta)^2(y_{t-2}(\alpha_k(\eta), \beta(\eta)))^2 \\ &\quad + 2\sqrt{\alpha_k(\eta)}\beta(\eta)^2y_{t-2}(\alpha_k(\eta), \beta(\eta))y_{t-3}(\alpha_k(\eta), \beta(\eta)) \\ &= \alpha_k(\eta)(y_{t-1}(\alpha_k(\eta), \beta(\eta)))^2 - 2\alpha_k(\eta)\beta(\eta)(y_{t-2}(\alpha_k(\eta), \beta(\eta)))^2 + \beta(\eta)^2(y_{t-2}(\alpha_k(\eta), \beta(\eta)))^2 \\ &\quad + \beta(\eta)(\alpha_k(\eta)(y_{t-2}(\alpha_k(\eta), \beta(\eta)))^2 + \beta(\eta)^2(y_{t-3}(\alpha_k(\eta), \beta(\eta)))^2 - (y_{t-1}(\alpha_k(\eta), \beta(\eta)))^2) \\ &= (\alpha_k(\eta) - \beta(\eta))(y_{t-1}(\alpha_k(\eta), \beta(\eta)))^2 - \beta(\eta)(\alpha_k(\eta) - \beta(\eta))(y_{t-2}(\alpha_k(\eta), \beta(\eta)))^2 \\ &\quad + \beta(\eta)^3(y_{t-3}(\alpha_k(\eta), \beta(\eta)))^2. \end{aligned}$$

This proves (28).

Now, using (27), we have

$$Y_t((1-\eta)I + \eta C, \beta(\eta))w = \sum_{k=1}^d y_t(\alpha_k(\eta), \beta(\eta))(u_k^T w)u_k. \quad (29)$$

Since  $u_1, u_2, \dots, u_d$  form an orthogonal basis in  $\mathbb{R}^d$ , we have

$$\|Y_t((1-\eta)I + \eta C, \beta(\eta))w\|^2 = \sum_{k=1}^d (y_t(\alpha_k(\eta), \beta(\eta)))^2 (u_k^T w)^2 = \sum_{k=1}^d p_t(\alpha_k(\eta), \beta(\eta))(u_k^T w)^2.$$

Using (90) and (92) in Lemma A.4, for  $k \geq 2$ , we have

$$p_t(\alpha_k(\eta), \beta(\eta)) \leq p_t(\alpha_1(\eta), \beta(\eta)) \quad (30)$$

Since  $\sum_{k=1}^d (u_k^T w)^2 = 1$ , we have

$$\|Y_t((1-\eta)I + \eta C, \beta(\eta))w\|^2 \leq p_t(\alpha_1(\eta), \beta(\eta)).$$

Moreover, using  $(u_1^T w)^2 \leq 1$  and (29), we obtain

$$\begin{aligned} (w^T Y_t((1-\eta)I + \eta C, \beta(\eta))w)^2 &= \left( y_t(\alpha_1(\eta), \beta(\eta))(u_1^T w)^2 + \sum_{k=2}^d y_t(\alpha_k(\eta), \beta(\eta))(u_k^T w)^2 \right)^2 \\ &\geq (y_t(\alpha_1(\eta), \beta(\eta)))^2 (u_1^T w)^4 - 2y_t(\alpha_1(\eta), \beta(\eta)) \sum_{k=2}^d |y_t(\alpha_k(\eta), \beta(\eta))| (u_k^T w)^2 \\ &\geq (y_t(\alpha_1(\eta), \beta(\eta)))^2 (u_1^T w)^4 - 2(y_t(\alpha_1(\eta), \beta(\eta)))^2 (1 - (u_1^T w)^2) \end{aligned}$$

Therefore,

$$\begin{aligned} \|PY_t((1-\eta)I + \eta C, \beta(\eta))w\|^2 &= \|Y_t((1-\eta)I + \eta C, \beta(\eta))w\|^2 - (w^T Y_t((1-\eta)I + \eta C, \beta(\eta))w)^2 \\ &\leq (y_t(\alpha_1(\eta), \beta(\eta)))^2 (1 - (u_1^T w)^4) + 2(y_t(\alpha_1(\eta), \beta(\eta)))^2 (1 - (u_1^T w)^2) \\ &\leq 4(y_t(\alpha_1(\eta), \beta(\eta)))^2 (1 - (u_1^T w)^2) \end{aligned}$$

where the last inequality follows from (26).

Lastly, we prove (24c). In the same way we prove (27) and (28), we can show that

$$Z_t((1-\eta)I + \eta C, \beta(\eta))u_k = z_t(\alpha_k(\eta), \beta(\eta))u_k, \quad (z_t(\alpha_k(\eta), \beta(\eta)))^2 = q_t(\alpha_k(\eta), \beta(\eta)). \quad (31)$$

Using (91) and (92) in Lemma A.4, for  $k \geq 2$ , we have

$$q_t(\alpha_k(\eta), \beta(\eta)) \leq q_t(\alpha_1(\eta), \beta(\eta)). \quad (32)$$

Using (31), we have

$$w^T Z_t((1-\eta)I + \eta C, \beta(\eta))w = \sum_{k=1}^d z_t(\alpha_k(\eta), \beta(\eta))(u_k^T w)^2 \leq \sum_{k=1}^d |z_t(\alpha_k(\eta), \beta(\eta))| (u_k^T w)^2.$$

Moreover, using (32) and the fact that  $\sum_{k=1}^d (u_k^T w)^2 = 1$ , we have

$$\sum_{k=1}^d |z_t(\alpha_k(\eta), \beta(\eta))| (u_k^T w)^2 \leq |z_t(\alpha_1(\eta), \beta(\eta))| \sum_{k=1}^d (u_k^T w)^2 = |z_t(\alpha_1(\eta), \beta(\eta))|.$$

This results in

$$w^T Z_t((1-\eta)I + \eta C, \beta(\eta))w \leq |z_t(\alpha_1(\eta), \beta(\eta))|,$$

leading to

$$\|Z_t((1-\eta)I + \eta C, \beta(\eta))\|^2 \leq |z_t(\alpha_1(\eta), \beta(\eta))|^2 = q_t(\alpha_1(\eta), \beta(\eta)).$$

This completes the proof.  $\square$

### A.1.1 VR Power

*Proof of Lemma 3.1.* Since  $Pw_0 = (I - w_0 w_0^T) w_0 = 0$ , we have

$$u_k^T w_1 = (1 - \eta)u_k^T w_0 + \eta u_k^T C w_0 + \eta u_k^T (C_0 - C) P w_0 = (1 - \eta + \eta \lambda_k) u_k^T w_0. \quad (33)$$

Taking the expectation of the square of (33), we obtain

$$E[(u_k^T w_1)^2] = (1 - \eta + \eta \lambda_k)^2 E[(u_k^T w_0)^2]. \quad (34)$$

For  $t \geq 2$ , we have

$$u_k^T w_t = (1 - \eta + \eta \lambda_k) u_k^T w_{t-1} + \eta u_k^T (C_{t-1} - C) P w_{t-1}. \quad (35)$$

Since  $S_t$  is sampled uniformly at random,  $C_t$  is independent of  $S_1, \dots, S_{t-1}$  and  $w_0$  with  $E[C_t] = C$ , leading to

$$\begin{aligned} E[u_k^T w_{t-1} u_k^T (C_{t-1} - C) P w_t] &= E[E[u_k^T w_{t-1} u_k^T (C_{t-1} - C) P w_t | w_0, S_1, \dots, S_{t-2}]] \\ &= E[u_k^T w_{t-1} u_k^T E[C_{t-1} - C] P w_t] = 0. \end{aligned}$$

Therefore, taking the expectation of the square of (35), we have

$$\begin{aligned} E[(u_k^T w_t)^2] &= (1 - \eta + \eta \lambda_k)^2 E[(u_k^T w_{t-1})^2] + \eta^2 E[w_{t-1}^T P (C_{t-1} - C) u_k u_k^T (C_{t-1} - C) P w_{t-1}] \\ &= (1 - \eta + \eta \lambda_k)^2 E[(u_k^T w_{t-1})^2] + \eta^2 E[w_{t-1}^T P M_k P w_{t-1}] \end{aligned} \quad (36)$$

where the last equality follows from

$$\begin{aligned} E[w_{t-1}^T P (C_{t-1} - C) u_k u_k^T (C_{t-1} - C) P w_{t-1}] &= E[E[w_{t-1}^T P (C_{t-1} - C) u_k u_k^T (C_{t-1} - C) P w_{t-1} | w_0, S_1, \dots, S_{t-2}]] \\ &= E[w_{t-1}^T P E[(C_{t-1} - C) u_k u_k^T (C_{t-1} - C)] P w_{t-1}] \\ &= E[w_{t-1}^T P M_k P w_{t-1}]. \end{aligned}$$

Repeatedly applying (36) and using (34), we obtain

$$E[(u_k^T w_t)^2] = (1 - \eta + \eta \lambda_k)^{2t} E[(u_k^T w_0)^2] + \eta^2 \sum_{i=1}^{t-1} (1 - \eta + \eta \lambda_k)^{2(t-i-1)} E[w_i^T P M_k P w_i].$$

□

*Proof of Lemma 3.2.* By Lemma A.2, we have

$$\sum_{k=2}^d E[w_t^T P M_k P w_t] = \sum_{k=2}^d E[w_t^T P M_k P w_t] = E[w_t^T P \sum_{k=2}^d M_k P w_t] \leq \left\| \sum_{k=2}^d M_k \right\| \cdot E[\|P w_t\|^2]. \quad (37)$$

Using the Jensen's inequality and the fact that  $\left\| \sum_{k=2}^d u_k u_k^T \right\| = 1$ , we have

$$\left\| \sum_{k=2}^d M_k \right\| = \left\| \sum_{k=2}^d E[(C_t - C) u_k u_k^T (C_t - C)] \right\| \leq E[\|C_t - C\|^2] = E[\|(C_t - C)^2\|] = K,$$

resulting in

$$\sum_{k=2}^d E[w_t^T P M_k P w_t] \leq K E[\|P w_t\|^2]. \quad (38)$$

Let

$$B_i = (1 - \eta)I + \eta C + \eta(C_i - C)P.$$

Since  $Pw_0 = 0$  and

$$\begin{aligned} \prod_{i=t-1}^0 B_i &= \prod_{i=t-1}^1 B_i \eta (C_0 - C) P + \prod_{i=t-1}^1 B_i ((1 - \eta)I + \eta C) \\ &= \prod_{i=t-1}^1 B_i \eta (C_0 - C) P + \sum_{j=1}^{t-1} \prod_{i=t-1}^{j+1} B_i \eta (C_j - C) P [(1 - \eta)I + \eta C]^j + [(1 - \eta)I + \eta C]^t, \end{aligned}$$

which can be seen by elementary manipulation, we have

$$w_t = \prod_{i=t-1}^0 B_i w_0 = \left[ \sum_{j=1}^{t-1} \prod_{i=t-1}^{j+1} B_i \eta (C_j - C) P [(1-\eta)I + \eta C]^j + [(1-\eta)I + \eta C]^t \right] w_0,$$

resulting in

$$P w_t = P \prod_{i=t-1}^0 B_i w_0 = \left[ \sum_{j=1}^{t-1} P \prod_{i=t-1}^{j+1} B_i \eta (C_j - C) P [(1-\eta)I + \eta C]^j + P [(1-\eta)I + \eta C]^t \right] w_0. \quad (39)$$

Since  $C_0, \dots, C_{t-1}$  are independent with  $E[C_i] = C$  for all  $1 \leq i \leq t-1$ , we obtain

$$E \left[ w_0^T [(1-\eta)I + \eta C]^t P^2 \prod_{i=t-1}^{j+1} B_i \eta (C_j - C) P [(1-\eta)I + \eta C]^j w_0 \right] = 0 \quad (40)$$

$$E \left[ w_0^T [(1-\eta)I + \eta C]^{j_1} P (C_{j_1} - C) \eta \prod_{i=j_1+1}^{t-1} B_i P^2 \prod_{i=t-1}^{j_2+1} B_i \eta (C_{j_2} - C) P [(1-\eta)I + \eta C]^{j_2} w_0 \right] = 0 \quad (41)$$

where  $1 \leq j, j_1, j_2 \leq t-1$  and  $j_1 \neq j_2$ . Therefore, we have

$$E[\|P w_t\|^2] = \sum_{j=1}^{t-1} E \left[ \left\| P \prod_{i=t-1}^{j+1} B_i \eta (C_j - C) P [(1-\eta)I + \eta C]^j w_0 \right\|^2 \right] + E[\|P [(1-\eta)I + \eta C]^t w_0\|^2] \quad (42)$$

due to cross-terms being 0 from (40) and (41) when ‘‘squaring’’ (39). Using Lemma A.1 with  $w = w_0/\|w_0\|$  and the fact that  $\|w_0\|^2(1 - (u_1^T w_0)^2/\|w_0\|^2) = \sum_{k=2}^d (u_k^T w_0)^2$ , we have

$$E[\|P[(1-\eta)I + \eta C]^t w_0\|^2] \leq 2(1-\eta + \eta \lambda_1)^{2t} \sum_{k=2}^d E[(u_k^T w_0)^2]. \quad (43)$$

By Lemma A.2 and  $\|P\| = 1$ , we have

$$\left\| P \prod_{i=t-1}^{j+1} B_i \eta (C_j - C) P [(1-\eta)I + \eta C]^j w_0 \right\|^2 \leq \eta^2 \left\| \prod_{i=t-1}^{j+1} B_i (C_j - C) P [(1-\eta)I + \eta C]^j w_0 \right\|^2. \quad (44)$$

Moreover, by repeatedly using first the property that  $B_i$  is independent of  $w_0, C_j, B_{j+1}, \dots, B_{i-1}$  and Lemma A.2, we have

$$\begin{aligned} & E \left[ \left\| \prod_{i=t-1}^{j+1} B_i (C_j - C) P [(1-\eta)I + \eta C]^j w_0 \right\|^2 \right] \\ &= E[w_0^T [(1-\eta)I + \eta C]^j P (C_j - C) \left( \prod_{i=t-2}^{j+1} B_i \right)^T B_{t-1}^T B_{t-1} \prod_{i=t-2}^{j+1} B_i P (C_j - C) [(1-\eta)I + \eta C]^j w_0] \\ &= E[w_0^T [(1-\eta)I + \eta C]^j P (C_j - C) \left( \prod_{i=t-2}^{j+1} B_i \right)^T E[B_{t-1}^T B_{t-1}] \prod_{i=t-2}^{j+1} B_i P (C_j - C) [(1-\eta)I + \eta C]^j w_0] \\ &\leq \|E[B_{t-1}^T B_{t-1}]\| \cdot E \left[ \left\| \prod_{i=t-2}^{j+1} B_i (C_j - C) P [(1-\eta)I + \eta C]^j w_0 \right\|^2 \right] \\ &\leq \prod_{i=t-1}^{j+1} \|E[B_i^T B_i]\| \cdot E[\|(C_j - C) P [(1-\eta)I + \eta C]^j w_0\|^2]. \end{aligned}$$

In the same way, using the fact that  $C_j$  is independent of  $w_0$  and Lemma A.2, we have

$$E[\|(C_j - C) P [(1-\eta)I + \eta C]^j w_0\|^2] \leq \|E[(C_j - C)^2]\| \cdot E[\|P [(1-\eta)I + \eta C]^j w_0\|^2],$$

resulting in

$$E\left[\left\|\prod_{i=t-1}^{j+1} B_i(C_j - C)P[(1-\eta)I + \eta C]^j w_0\right\|^2\right] \leq \prod_{i=t-1}^{j+1} \|E[B_i^T B_i]\| \cdot \|E[(C_j - C)^2]\| \cdot E\|P[(1-\eta)I + \eta C]^j w_0\|^2. \quad (45)$$

Since  $C_i$  is independent of  $w_0$  and  $E[C_i] = C$ , we have

$$\|E[B_i^T B_i]\| \leq \|(1-\eta)I + \eta C\|^2 + \eta^2 \|E[P(C_i - C)^2 P]\|.$$

Since all induced norms are convex, using the Jensen's inequality, we have

$$\|E[P(C_i - C)^2 P]\| \leq E\|P(C_i - C)^2 P\| \leq E\|(C_i - C)^2\| = K,$$

leading to

$$\|E[B_i^T B_i]\| \leq \|(1-\eta)I + \eta C\|^2 + \eta^2 \|E[P(C_i - C)^2 P]\| \leq (1-\eta + \eta\lambda_1)^2 + \eta^2 K. \quad (46)$$

In the same way, we obtain

$$\|E[(C_j - C)^2]\| \leq E\|(C_j - C)^2\| = K. \quad (47)$$

Using (46), (47) and (43) for (45), we have

$$E\left[\left\|\prod_{i=t-1}^{j+1} B_i(C_j - C)P[(1-\eta)I + \eta C]^j w_0\right\|^2\right] \leq K [(1-\eta + \eta\lambda_1)^2 + \eta^2 K]^{t-j-1} (1-\eta + \eta\lambda_1)^{2j} \sum_{k=2}^d E[(u_k^T w_0)^2]. \quad (48)$$

From (42), (43), (44) and (48), we finally have

$$\begin{aligned} E\|Pw_t\|^2 &\leq 2 \left[ \sum_{j=1}^{t-1} \eta^2 K [(1-\eta + \eta\lambda_1)^2 + \eta^2 K]^{t-j-1} (1-\eta + \eta\lambda_1)^{2j} + (1-\eta + \eta\lambda_1)^{2t} \right] \cdot \sum_{k=2}^d E[(u_k^T w_0)^2] \\ &\leq 2 [(1-\eta + \eta\lambda_1)^2 + \eta^2 K]^t \cdot \sum_{k=2}^d E[(u_k^T w_0)^2], \end{aligned}$$

where the last inequality can be checked by elementary manipulation. This results in

$$\sum_{k=2}^d E[w_t^T P M_k P w_t] \leq 2K [(1-\eta + \eta\lambda_1)^2 + \eta^2 K]^t \cdot \sum_{k=2}^d E[(u_k^T w_0)^2]. \quad (49)$$

This proves the first part of the proof.

Next, we have

$$\sum_{k=2}^d \sum_{i=1}^{t-1} (1-\eta + \eta\lambda_k)^{2(t-i-1)} E[w_i^T P M_k P w_i] \leq (1-\eta + \eta\lambda_1)^{2t} \cdot \sum_{i=1}^{t-1} (1-\eta + \eta\lambda_1)^{-2(i+1)} \sum_{k=2}^d E[w_i^T P M_k P w_i]$$

and

$$\begin{aligned} \sum_{i=1}^{t-1} (1-\eta + \eta\lambda_1)^{-2(i+1)} [(1-\eta + \eta\lambda_1)^2 + \eta^2 K]^i &\leq \frac{1}{(1-\eta + \eta\lambda_1)^2} \sum_{i=1}^{t-1} \left( \frac{(1-\eta + \eta\lambda_1)^2 + \eta^2 K}{(1-\eta + \eta\lambda_1)^2} \right)^i \\ &\leq \frac{1}{\eta^2 K} \left[ \left( 1 + \frac{\eta^2 K}{(1-\eta + \eta\lambda_1)^2} \right)^{t-1} - 1 \right] \left( 1 + \frac{\eta^2 K}{(1-\eta + \eta\lambda_1)^2} \right) \\ &\leq \frac{1}{\eta^2 K} \left[ \exp\left( \frac{\eta^2 K t}{(1-\eta + \eta\lambda_1)^2} \right) - 1 \right]. \end{aligned}$$

Using the condition that

$$0 < \frac{\eta^2 K m}{(1 - \eta + \eta \lambda_1)^2} < 1$$

and the fact  $\exp(x) - 1 \leq 2x$  for all  $x \in (0, 1)$ , we further obtain

$$\sum_{i=1}^{t-1} (1 - \eta + \eta \lambda_1)^{-2(i+1)} [(1 - \eta + \eta \lambda_1)^2 + \eta^2 K]^i \leq \frac{2t}{(1 - \eta + \eta \lambda_1)^2}.$$

Combined with (49), this results in

$$\begin{aligned} \eta^2 \sum_{k=2}^d \sum_{i=1}^{m-1} (1 - \eta + \eta \lambda_k)^{2(m-i-1)} E[w_i^T P M_k P w_i] &\leq \eta^2 \sum_{i=1}^{m-1} (1 - \eta + \eta \lambda_k)^{2(m-i-1)} \sum_{k=2}^d E[w_i^T P M_k P w_i] \\ &\leq 4\eta^2 K m (1 - \eta + \eta \lambda_1)^{2(m-1)} \cdot \sum_{k=2}^d E[(u_k^T w_0)^2]. \end{aligned}$$

Using Lemma 3.1 for  $t = m$  and the fact that  $(1 - \eta + \eta \lambda_k)^{2m} \leq (1 - \eta + \eta \lambda_2)^{2m}$  for  $k \geq 2$ , we finally have

$$\begin{aligned} \sum_{k=2}^d E[(u_k^T w_m)^2] &= \sum_{k=2}^d (1 - \eta + \eta \lambda_k)^{2m} E[(u_k^T w_0)^2] + \eta^2 \sum_{k=2}^d \sum_{i=1}^{m-1} (1 - \eta + \eta \lambda_k)^{2(m-i-1)} E[w_i^T P M_k P w_i] \\ &\leq \left( (1 - \eta + \eta \lambda_2)^{2m} + 4\eta^2 K m (1 - \eta + \eta \lambda_1)^{2(m-1)} \right) \cdot \sum_{k=2}^d E[(u_k^T w_0)^2]. \end{aligned} \quad (50)$$

On the other hand, by Lemma 3.1 and the fact that  $P M_k P$  is positive semi-definite, we have

$$(1 - \eta + \eta \lambda_1)^{2m} E[(u_1^T w_0)^2] \leq E[(u_1^T w_m)^2]. \quad (51)$$

Combining (51) with (50), we obtain

$$\frac{\sum_{k=2}^d E[(u_k^T w_m)^2]}{E[(u_1^T w_m)^2]} \leq \left[ \left( \frac{1 - \eta + \eta \lambda_2}{1 - \eta + \eta \lambda_1} \right)^{2m} + \frac{4\eta^2 K m}{(1 - \eta + \eta \lambda_1)^2} \right] \cdot \frac{\sum_{k=2}^d E[(u_k^T w_0)^2]}{E[(u_1^T w_0)^2]}.$$

□

*Proof of Lemma 3.3.* From the conditions on  $\eta$ ,  $m$  and  $|S|$ , we have

$$0 < \frac{\eta^2 K m}{(1 - \eta + \eta \lambda_1)^2} < \frac{1}{16}.$$

Therefore, using Lemma 3.2, we have

$$\frac{\sum_{k=2}^d E[(u_k^T w_m)^2]}{E[(u_1^T w_m)^2]} \leq \left[ \left( \frac{1 - \eta + \eta \lambda_2}{1 - \eta + \eta \lambda_1} \right)^{2m} + \frac{4\eta^2 K m}{(1 - \eta + \eta \lambda_1)^2} \right] \cdot \frac{\sum_{k=2}^d E[(u_k^T w_0)^2]}{E[(u_1^T w_0)^2]}.$$

By the choice of  $\eta$  and  $m$ , we have

$$\left( \frac{1 - \eta + \eta \lambda_2}{1 - \eta + \eta \lambda_1} \right)^{2m} = \left( 1 - \frac{\eta(\lambda_1 - \lambda_2)}{1 - \eta + \eta \lambda_1} \right)^{2m} \leq \exp \left( -\frac{2\eta(\lambda_1 - \lambda_2)m}{1 - \eta + \eta \lambda_1} \right) \leq \exp(-\log 2) = \frac{1}{2}.$$

Also, by the choice of  $\eta$ ,  $m$  and  $|S|$ , we have

$$\frac{4\eta^2 K m}{(1 - \eta + \eta \lambda_1)^2} = \frac{4\sigma^2 \eta^2 m}{|S|(1 - \eta + \eta \lambda_1)^2} \leq \frac{1}{4}.$$

Therefore, we have

$$\frac{\sum_{k=2}^d E[(u_k^T w_m)^2]}{E[(u_1^T w_m)^2]} \leq \frac{3}{4} \cdot \frac{\sum_{k=2}^d E[(u_k^T w_0)^2]}{E[(u_1^T w_0)^2]}.$$

□

*Proof of Theorem 3.4.* By repeatedly applying Lemma 3.3, we have

$$\frac{\sum_{k=2}^d E[(u_k^T \tilde{w}_\tau)^2]}{E[(u_1^T \tilde{w}_\tau)^2]} \leq \left(\frac{3}{4}\right)^\tau \frac{\sum_{k=2}^d E[(u_k^T \tilde{w}_0)^2]}{E[(u_1^T \tilde{w}_0)^2]} = \left(\frac{3}{4}\right)^\tau \tilde{\theta}_0.$$

Since  $\tau = \lceil \log(\tilde{\theta}_0/\epsilon) / \log(4/3) \rceil$ , we have

$$\tau \log\left(\frac{3}{4}\right) \leq \log\left(\frac{\epsilon}{\tilde{\theta}_0}\right),$$

resulting in

$$\frac{\sum_{k=2}^d E[(u_k^T \tilde{w}_\tau)^2]}{E[(u_1^T \tilde{w}_\tau)^2]} \leq \epsilon.$$

□



### A.1.2 VR HB Power

*Proof of Lemma 3.5.* From

$$\begin{aligned} w_1 &= (1 - \eta)w_0 + \eta\tilde{g} \\ &= (1 - \eta)w_0 + \eta Cw_0, \end{aligned}$$

we have

$$\begin{aligned} u_k^T w_1 &= (1 - \eta)u_k^T w_0 + \eta u_k^T Cw_0 \\ &= (1 - \eta)u_k^T w_0 + \eta \lambda_k u_k^T w_0 \\ &= (1 - \eta + \eta \lambda_k)u_k^T w_0. \end{aligned} \tag{52}$$

Taking the expectation of the square of (52), we obtain

$$E[(u_k^T w_1)^2] = (1 - \eta + \eta \lambda_k)^2 E[(u_k^T w_0)^2] = \frac{\alpha_k(\eta)}{4} E[(u_k^T w_0)^2]. \tag{53}$$

Next, from (5), we have

$$\begin{aligned} w_{t+1} &= 2 \left( (1 - \eta)w_t + \eta \frac{1}{|S_t|} \sum_{i_t \in S_t} a_{i_t} a_{i_t}^T \left( w_t - \frac{(w_t^T w_0)}{\|w_0\|^2} w_0 \right) + \frac{(w_t^T w_0)}{\|w_0\|^2} \tilde{g} \right) - \beta(\eta)w_{t-1} \\ &= 2 \left( (1 - \eta)w_t + \eta \frac{1}{|S_t|} \sum_{i_t \in S_t} a_{i_t} a_{i_t}^T \left( I - \frac{w_0 w_0^T}{\|w_0\|^2} \right) w_t + C \frac{w_0 w_0^T}{\|w_0\|^2} w_t \right) - \beta(\eta)w_{t-1} \\ &= 2 \left( (1 - \eta)w_t + \eta Cw_t + \eta \frac{1}{|S_t|} \sum_{i_t \in S_t} (a_{i_t} a_{i_t}^T - C) \left( I - \frac{w_0 w_0^T}{\|w_0\|^2} \right) w_t \right) - \beta(\eta)w_{t-1} \\ &= 2((1 - \eta)w_t + \eta Cw_t + \eta(C_t - C)Pw_t) - \beta(\eta)w_{t-1}, \end{aligned} \tag{54}$$

leading to

$$u_k^T w_{t+1} = 2((1 - \eta + \eta \lambda_k)u_k^T w_t + \eta u_k^T (C_t - C)Pw_t) - \beta(\eta)u_k^T w_{t-1}. \tag{55}$$

Taking the square of (55), we have

$$\begin{aligned} (u_k^T w_{t+1})^2 &= 4(1 - \eta + \eta \lambda_k)^2 (u_k^T w_t)^2 + 4\eta^2 w_t^T P(C_t - C)u_k u_k^T (C_t - C)Pw_t + (\beta(\eta))^2 (u_k^T w_{t-1})^2 \\ &\quad + 8\eta(1 - \eta + \eta \lambda_k)u_k^T w_t u_k^T (C_t - C)Pw_t - 4(1 - \eta + \eta \lambda_k)\beta(\eta)u_k^T w_t u_k^T w_{t-1} \\ &\quad - 4\eta\beta(\eta)u_k^T (C_t - C)Pw_t u_k^T w_{t-1}. \end{aligned} \tag{56}$$

Since  $S_t$  is sampled uniformly at random,  $C_t$  is independent of  $S_1, \dots, S_{t-1}$  and identically distributed with  $E[C_t] = C$ . Therefore,

$$E[u_k^T w_t u_k^T (C_t - C)Pw_t] = E[E[u_k^T w_t u_k^T (C_t - C)Pw_t | w_0, S_1, \dots, S_{t-1}]] = E[u_k^T w_t u_k^T E[C_t - C]Pw_t] = 0.$$

Similarly, we have

$$E[u_k^T (C_t - C)Pw_t u_k^T w_{t-1}] = 0. \tag{57}$$

As a result, we obtain

$$\begin{aligned} E[(u_k^T w_{t+1})^2] &= \alpha_k(\eta)E[(u_k^T w_t)^2] - 2\sqrt{\alpha_k(\eta)}\beta(\eta)E[(u_k^T w_t)(u_k^T w_{t-1})] + (\beta(\eta))^2 E[(u_k^T w_{t-1})^2] \\ &\quad + 4\eta^2 E[w_t^T P M_k P w_t]. \end{aligned} \tag{58}$$

Using (52) and (53) in (58) for  $t = 1$ , we have

$$E[(u_k^T w_2)^2] = \left( \frac{\alpha_k(\eta)}{2} - \beta(\eta) \right)^2 E[(u_k^T w_0)^2] + 4\eta^2 E[w_1^T P M_k P w_1]. \tag{59}$$

Moreover, by using (55) with  $t - 1$ , multiplying it with  $u_k^T w_{t-1}$ , taking expectation and using (57) with  $w_t$  being  $w_{t-1}$  (which can be derived in the same way as (57)), we have

$$E[(u_k^T w_t)(u_k^T w_{t-1})] = \sqrt{\alpha_k(\eta)} E[(u_k^T w_{t-1})^2] - \beta(\eta) E[(u_k^T w_{t-1})(u_k^T w_{t-2})]. \quad (60)$$

Using (60), we can further write (58) as

$$\begin{aligned} E[(u_k^T w_{t+1})^2] &= \alpha_k(\eta) E[(u_k w_t)^2] - \beta(\eta)(2\alpha_k(\eta) - \beta(\eta)) E[(u_k^T w_{t-1})^2] \\ &\quad + 2\sqrt{\alpha_k(\eta)}(\beta(\eta))^2 E[(u_k^T w_{t-1})(u_k^T w_{t-2})] + 4\eta^2 E[w_t^T P M_k P w_t]. \end{aligned} \quad (61)$$

With  $t - 1$  in (58), we have

$$\begin{aligned} E[(u_k^T w_t)^2] &= \alpha_k(\eta) E[(u_k^T w_{t-1})^2] - 2\sqrt{\alpha_k(\eta)}\beta(\eta) E[(u_k^T w_{t-1})(u_k^T w_{t-2})] + (\beta(\eta))^2 E[(u_k^T w_{t-2})^2] \\ &\quad + 4\eta^2 E[w_{t-1}^T P M_k P w_{t-1}]. \end{aligned} \quad (62)$$

Adding (62) multiplied by  $\beta(\eta)$  to (61), we obtain

$$\begin{aligned} E[(u_k^T w_{t+1})^2] &= (\alpha_k(\eta) - \beta(\eta)) E[(u_k^T w_t)^2] - \beta(\eta)(\alpha_k(\eta) - \beta(\eta)) E[(u_k^T w_{t-1})^2] + (\beta(\eta))^3 E[(u_k^T w_{t-2})^2] \\ &\quad + 4\eta^2 E[w_t^T P M_k P w_t] + 4\eta^2 \beta(\eta) E[w_{t-1}^T P M_k P w_{t-1}]. \end{aligned} \quad (63)$$

With  $t - 1$  in (63), we finally have

$$\begin{aligned} E[(u_k^T w_t)^2] &= (\alpha_k(\eta) - \beta(\eta)) E[(u_k^T w_{t-1})^2] - \beta(\eta)(\alpha_k(\eta) - \beta(\eta)) E[(u_k^T w_{t-2})^2] + (\beta(\eta))^3 E[(u_k^T w_{t-3})^2] \\ &\quad + 4\eta^2 E[w_{t-1}^T P M_k P w_{t-1}] + 4\eta^2 \beta(\eta) E[w_{t-2}^T P M_k P w_{t-2}] \end{aligned} \quad (64)$$

for  $t \geq 3$ .

Using Lemma A.4 for  $E[(u_k^T w_t)^2]$  defined by (53), (59), and (64) with

$$\alpha = \alpha_k(\eta), \quad \beta = \beta(\eta), \quad L_0 = E[(u_k^T w_0)^2], \quad L_t = 4\eta^2 E[w_t^T P M_k P w_t],$$

we have

$$E[(u_k^T w_t)^2] = p_t(\alpha_k(\eta), \beta(\eta)) E[(u_k^T w_0)^2] + 4\eta^2 \sum_{r=1}^{t-1} q_{t-r-1}(\alpha_k(\eta), \beta(\eta)) E[w_r^T P M_k P w_r].$$

□

*Proof of Lemma 3.6.* Since  $\|\sum_{k=2}^d u_k u_k^T\| \leq 1$ , we have

$$\left\| \sum_{k=2}^d M_k \right\| = \left\| \sum_{k=2}^d E[(C_t - C) u_k u_k^T (C_t - C)] \right\| \leq E[\|C_t - C\|^2] = E[\|(C_t - C)^2\|] = K.$$

By Lemma A.2, this leads to

$$\sum_{k=2}^d E[w_t^T P M_k P w_t] = E[w_t^T P \sum_{k=2}^d M_k P w_t] \leq \left\| \sum_{k=2}^d M_k \right\| E[\|P w_t\|^2] \leq K E[\|P w_t\|^2]. \quad (65)$$

Let

$$F = \begin{bmatrix} I \\ 0 \end{bmatrix}, \quad G = \begin{bmatrix} 2[(1-\eta)I + \eta C] & -\beta(\eta)I \\ I & 0 \end{bmatrix}, \quad G_0 = \begin{bmatrix} (1-\eta)I + \eta C & -\beta(\eta)I \\ I & 0 \end{bmatrix}, \quad H_t = 2\eta \begin{bmatrix} (C_t - C)P & 0 \\ 0 & 0 \end{bmatrix}.$$

From the update rule in Algorithm 2 expressed in (54), we can write

$$w_t = F^T (G + H_{t-1})(G + H_{t-2}) \cdots (G + H_1)(G_0 + H_0) F w_0.$$

Using Lemma A.3 for the expansion of  $(G + H_{t-1})(G + H_{t-2}) \cdots (G + H_1)(G_0 + H_0)$ , we have

$$Pw_t = PF^T \left( G^{t-1}G_0 + \sum_{i=1}^{t-1} \left[ \prod_{j=t-1}^{i+1} (G + H_j) H_i G^{i-1} G_0 \right] + \prod_{j=t-1}^1 (G + H_j) H_0 \right) Fw_0. \quad (66)$$

Since  $C_0, C_1, \dots, C_{t-1}$  are independent and identically distributed with mean  $C$ , so are  $H_0, H_1, \dots, H_{t-1}$  with mean 0. Therefore, the expectation of all cross-terms in the “square” of (66) are zero. Using the fact that  $H_0 Fw_0 = 0$ , we have

$$E[\|Pw_t\|^2] = E[\|PF^T G^{t-1} G_0 Fw_0\|^2] + \sum_{i=1}^{t-1} E \left[ \left\| PF^T \prod_{j=t-1}^{i+1} (G + H_j) H_i G^{i-1} G_0 Fw_0 \right\|^2 \right]. \quad (67)$$

Note that this result is analogous to (42) in the analysis of VR Power. From  $F^T G^{t-1} G_0 F = Y_t((1-\eta)I + \eta C, \beta(\eta))$  (see (20) for the definition of  $Y_t$ ) and (24b) in Lemma A.1 with  $w = w_0/\|w_0\|$  and the fact that  $\|w_0\|^2(1 - (u_1^T w_0)^2/\|w_0\|^2) = \sum_{k=2}^d (u_k^T w_0)^2$ , we have

$$E[\|PF^T G^{t-1} G_0 Fw_0\|^2] = 4p_t(\alpha_1(\eta), \beta(\eta)) \cdot \sum_{k=2}^d E[(u_k^T w_0)^2]. \quad (68)$$

Using Lemma A.2,  $\|P\| = 1$ ,  $H_t = 2\eta F(C_t - C)PF^T$ , we have

$$\begin{aligned} E \left[ \left\| PF^T \prod_{j=t-1}^{i+1} (G + H_j) H_i G^{i-1} G_0 Fw_0 \right\|^2 \right] &\leq 4\eta^2 \|P\|^2 \cdot E \left[ \left\| F^T \prod_{j=t-1}^{i+1} (G + H_j) F(C_i - C) PF^T G^{i-1} G_0 Fw_0 \right\|^2 \right] \\ &\leq \|E[F^T [ \prod_{j=t-1}^{i+1} (G + H_j) ]^T F F^T \prod_{j=t-1}^{i+1} (G + H_j) F]\| \\ &\quad \cdot 4\eta^2 E \left[ \left\| (C_i - C) PF^T G^{i-1} G_0 Fw_0 \right\|^2 \right]. \end{aligned} \quad (69)$$

Using mathematical induction on  $i$ , we prove that

$$E \left[ \left[ \prod_{j=t-1}^{i+1} (G + H_j) \right]^T F F^T \prod_{j=t-1}^{i+1} (G + H_j) \right] = \sum_{\substack{(v_{i+1}, \dots, v_{t-1}) \\ \in \{0,1\}^{t-i-1}}} E \left[ \left[ \prod_{j=t-1}^{i+1} H_j^{1-v_j} G^{v_j} \right]^T F F^T \prod_{j=t-1}^{i+1} H_j^{1-v_j} G^{v_j} \right] \quad (70)$$

for any  $i \leq t-2$  and fixed  $t \geq 2$ . Since  $E[H_{t-1}] = 0$ , we have

$$E[(G^T + H_{t-1}^T) F F^T (G + H_{t-1})] = G^T F F^T G + E[H_{t-1}^T F F^T H_{t-1}].$$

This proves the base case for  $i = t-2$ .

Suppose that (70) holds for  $i = k$ . Then, since  $H_k$  is independent from  $H_{k+1}, \dots, H_{t-1}$  and  $E[H_k] = 0$ , we have

$$\begin{aligned} E \left[ \left[ \prod_{j=t-1}^k (G + H_j) \right]^T F F^T \prod_{j=t-1}^k (G + H_j) \right] &= G^T E \left[ \left[ \prod_{j=t-1}^{k+1} (G + H_j) \right]^T F F^T \prod_{j=t-1}^{k+1} (G + H_j) \right] G \\ &\quad + E \left[ H_k^T \left[ \prod_{j=t-1}^{k+1} (G + H_j) \right]^T F F^T \prod_{j=t-1}^{k+1} (G + H_j) H_k \right]. \end{aligned}$$

From (70), we have

$$\begin{aligned} &G^T E \left[ \left[ \prod_{j=t-1}^{k+1} (G + H_j) \right]^T F F^T \prod_{j=t-1}^{k+1} (G + H_j) \right] G \\ &= \sum_{\substack{(v_{k+1}, \dots, v_{t-1}) \\ \in \{0,1\}^{t-k-1}}} E \left[ \left[ \left( \prod_{j=t-1}^{k+1} H_j^{1-v_j} G^{v_j} \right) G \right]^T F F^T \left( \prod_{j=t-1}^{k+1} H_j^{1-v_j} G^{v_j} \right) G \right]. \end{aligned}$$

Also, by the independence of  $H_k$  from  $H_{k+1}, \dots, H_{t-1}$  and (70), we have

$$\begin{aligned}
 & E[H_k^T \left[ \prod_{j=t-1}^{k+1} (G + H_j) \right]^T F F^T \prod_{j=t-1}^{k+1} (G + H_j) H_k] \\
 &= E[H_k^T E \left[ \left[ \prod_{j=t-1}^{k+1} (G + H_j) \right]^T F F^T \prod_{j=t-1}^{k+1} (G + H_j) \right] H_k] \\
 &= E[H_k^T \sum_{\substack{(v_{k+1}, \dots, v_{t-1}) \\ \in \{0,1\}^{t-i-1}}} E \left[ \left[ \prod_{j=t-1}^{k+1} H_j^{1-v_j} G^{v_j} \right]^T F F^T \prod_{j=t-1}^{k+1} H_j^{1-v_j} G^{v_j} \right] H_k] \\
 &= \sum_{\substack{(v_{k+1}, \dots, v_{t-1}) \\ \in \{0,1\}^{t-k-1}}} E \left[ \left[ \left( \prod_{j=t-1}^{k+1} H_j^{1-v_j} G^{v_j} \right) H_k \right]^T F F^T \left( \prod_{j=t-1}^{k+1} H_j^{1-v_j} G^{v_j} \right) H_k \right].
 \end{aligned}$$

Therefore, we have

$$E \left[ \left[ \prod_{j=t-1}^k (G + H_j) \right]^T F F^T \prod_{j=t-1}^k (G + H_j) \right] = \sum_{\substack{(v_k, \dots, v_{t-1}) \\ \in \{0,1\}^{t-k}}} E \left[ \left[ \prod_{j=t-1}^k H_j^{1-v_j} G^{v_j} \right]^T F F^T \prod_{j=t-1}^k H_j^{1-v_j} G^{v_j} \right],$$

which completes the proof of (70).

Using the Jensen's inequality and the norm property of a symmetric matrix, we have

$$\|E[F^T \left[ \prod_{j=t-1}^{i+1} [H_j^{1-v_j} G^{v_j}] \right]^T F F^T \prod_{j=t-1}^{i+1} [H_j^{1-v_j} G^{v_j}] F]\| \leq E[\|F^T \prod_{j=t-1}^{i+1} [H_j^{1-v_j} G^{v_j}] F\|^2]. \quad (71)$$

For  $(v_{i+1}, \dots, v_{t-1}) \in \{0, 1\}^{t-i-1}$ , let  $J = \{j_1, j_2, \dots, j_{\bar{k}}\}$  be a set of indices such that  $j_1 < j_2 < \dots < j_{\bar{k}}$  and  $v_j = 0$  if  $j \in J$  and  $v_j = 1$  otherwise. Also, let  $j_0 = i$ . Using that  $H_j = F F^T H_j F F^T$ , we have

$$\begin{aligned}
 E[\|F^T \prod_{j=t-1}^{i+1} [H_j^{1-v_j} G^{v_j}] F\|^2] &= E[\|F^T G^{t-j_{\bar{k}}-1} F \prod_{l=\bar{k}}^1 (F^T H_{j_l} F F^T G^{j_l-j_{l-1}-1} F)\|^2] \\
 &\leq E[\|F^T G^{t-j_{\bar{k}}-1} F\|^2 \prod_{l=\bar{k}}^1 \|F^T H_{j_l} F\|^2 \|F^T G^{j_l-j_{l-1}-1} F\|^2]. \quad (72)
 \end{aligned}$$

Since  $F^T G^t F = Z_t((1-\eta)I + \eta C, \beta(\eta))$ , using (24c) in Lemma A.1, we have

$$\|F^T G^t F\|^2 \leq q_t(\alpha_1(\eta), \beta(\eta)). \quad (73)$$

Also, from that  $F^T H_t F = 2\eta(C_t - C)P$ , we have

$$E[\|F^T H_t F\|^2] \leq 4\eta^2 E[\|(C_t - C)P\|^2] \leq 4\eta^2 E[\|(C_t - C)\|^2] = 4\eta^2 E[\|(C_t - C)^2\|] = 4\eta^2 K. \quad (74)$$

where the last inequality follows from  $\|P\| = 1$  and the second last equality follows from the symmetry of  $C_t - C$ . Using (73) and Lemma A.5, we have

$$\|F^T G^{t-j_{\bar{k}}-1} F\|^2 \prod_{l=\bar{k}}^1 \|F^T G^{j_l-j_{l-1}-1} F\|^2 \leq \left( \frac{1}{\alpha_1(\eta) - 4\beta(\eta)} \right)^{\bar{k}} q_{t-i-1}(\alpha_1(\eta), \beta(\eta)). \quad (75)$$

Note that there are  $\bar{k} + 1$  terms of the form  $\|F^T G^t F\|^2$  for some  $t \geq 0$  on the left-hand side of the above inequality and we use Lemma A.5  $\bar{k}$  times to obtain the term on the right-hand side.

Using (71), (72), (75), and the independence of  $C_0, C_1, \dots, C_{t-1}$ , we obtain

$$\|E[F^T \left[ \prod_{j=t-1}^{i+1} [H_j^{1-v_j} G^{v_j}] \right]^T F F^T \prod_{j=t-1}^{i+1} [H_j^{1-v_j} G^{v_j}] F]\| \leq \left( \frac{4\eta^2 K}{\alpha_1(\eta) - 4\beta(\eta)} \right)^{\bar{k}} q_{t-i-1}(\alpha_1(\eta), \beta(\eta)).$$

Combined with (70), this results in

$$\begin{aligned}
 & \|E[F^T [\prod_{j=t-1}^{i+1} (G + H_j)]^T F F^T \prod_{j=t-1}^{i+1} (G + H_j) F]\| \\
 &= \left\| \sum_{\substack{(v_{i+1}, \dots, v_{t-1}) \\ \in \{0,1\}^{t-i-1}}} E[F^T [\prod_{j=t-1}^{i+1} [H_j^{1-v_j} G^{v_j}]]^T F F^T \prod_{j=t-1}^{i+1} [H_j^{1-v_j} G^{v_j}] F]\right\| \\
 &\leq \sum_{\substack{(v_{i+1}, \dots, v_{t-1}) \\ \in \{0,1\}^{t-i-1}}} \|E[F^T [\prod_{j=t-1}^{i+1} [H_j^{1-v_j} G^{v_j}]]^T F F^T \prod_{j=t-1}^{i+1} [H_j^{1-v_j} G^{v_j}] F]\| \\
 &\leq \sum_{\bar{k}=0}^{t-i-1} \binom{t-i-1}{\bar{k}} \left( \frac{4\eta^2 K}{\alpha_1(\eta) - 4\beta(\eta)} \right)^{\bar{k}} q_{t-i-1}(\alpha_1(\eta), \beta(\eta)) \\
 &= q_{t-i-1}(\alpha_1(\eta), \beta(\eta)) \left( 1 + \frac{4\eta^2 K}{\alpha_1(\eta) - 4\beta(\eta)} \right)^{t-i-1}.
 \end{aligned} \tag{76}$$

On the other hand, using Lemma A.2 and (68) for  $t = i$ , we have

$$\begin{aligned}
 \eta^2 E[\|(C_i - C) P F^T G^{i-1} G_0 F w_0\|^2] &= \eta^2 E[w_0 F^T G_0^T (G^{i-1})^T F P^T E[(C_i - C)^2] P F^T G^{i-1} G_0 F w_0] \\
 &\leq \eta^2 \|E[(C_i - C)^2]\| E[\|P F^T G^{i-1} G_0 F w_0\|^2] \\
 &\leq 4\eta^2 K \cdot p_i(\alpha_1(\eta), \beta(\eta)) \cdot \sum_{k=2}^d E[(u_k^T w_0)^2].
 \end{aligned} \tag{77}$$

Using (76) and (77) to bound (69), we have

$$\begin{aligned}
 & E[\|P F^T \prod_{j=t-1}^{i+1} (G + H_j) H_i G^{i-1} G_0 F w_0\|^2] \\
 &\leq 16\eta^2 K \cdot p_i(\alpha_1(\eta), \beta(\eta)) \cdot q_{t-i-1}(\alpha_1(\eta), \beta(\eta)) \left( 1 + \frac{4\eta^2 K}{\alpha_1(\eta) - 4\beta(\eta)} \right)^{t-i-1} \cdot \sum_{k=2}^d E[(u_k^T w_0)^2]
 \end{aligned} \tag{78}$$

Using (68) and (78) for (67), we finally have

$$\begin{aligned}
 E[\|P w_t\|^2] &\leq \left[ 4p_t(\alpha_1(\eta), \beta(\eta)) + 16\eta^2 K \sum_{i=1}^{t-1} p_i(\alpha_1(\eta), \beta(\eta)) \cdot q_{t-i-1}(\alpha_1(\eta), \beta(\eta)) \left( 1 + \frac{4\eta^2 K}{\alpha_1(\eta) - 4\beta(\eta)} \right)^{t-i-1} \right] \\
 &\quad \cdot \sum_{k=2}^d E[(u_k^T w_0)^2].
 \end{aligned}$$

By (90) and (91) in Lemma A.4, we have

$$\begin{aligned}
 p_t(\alpha_1(\eta), \beta(\eta)) &\leq \left( \frac{\sqrt{\alpha_1(\eta)}}{2} + \frac{\sqrt{\alpha_1(\eta) - 4\beta(\eta)}}{2} \right)^{2t}, \\
 q_t(\alpha_1(\eta), \beta(\eta)) &\leq \left( \frac{1}{\alpha_1(\eta) - \beta(\eta)} \right) \left( \frac{\sqrt{\alpha_1(\eta)}}{2} + \frac{\sqrt{\alpha_1(\eta) - 4\beta(\eta)}}{2} \right)^{2(t+1)}.
 \end{aligned}$$

Therefore, we obtain

$$\begin{aligned}
 & \left[ 4p_t(\alpha_1(\eta), \beta(\eta)) + 16\eta^2 K \sum_{i=1}^{t-1} p_i(\alpha_1(\eta), \beta(\eta)) \cdot q_{t-i-1}(\alpha_1(\eta), \beta(\eta)) \left( 1 + \frac{4\eta^2 K}{\alpha_1(\eta) - 4\beta(\eta)} \right)^{t-i-1} \right] \\
 & \leq 4 \left[ 1 + \frac{4\eta^2 K}{\alpha_1(\eta) - 4\beta(\eta)} \sum_{i=1}^{t-1} \left( 1 + \frac{4\eta^2 K}{\alpha_1(\eta) - 4\beta(\eta)} \right)^{t-i-1} \right] \cdot \left( \frac{\sqrt{\alpha_1(\eta)}}{2} + \frac{\sqrt{\alpha_1(\eta) - 4\beta(\eta)}}{2} \right)^{2t} \\
 & = 4 \left( 1 + \frac{4\eta^2 K}{\alpha_1(\eta) - 4\beta(\eta)} \right)^{t-1} \cdot \left( \frac{\sqrt{\alpha_1(\eta)}}{2} + \frac{\sqrt{\alpha_1(\eta) - 4\beta(\eta)}}{2} \right)^{2t},
 \end{aligned}$$

which results in

$$E[\|Pw_t\|^2] \leq 4 \left( 1 + \frac{4\eta^2 K}{\alpha_1(\eta) - 4\beta(\eta)} \right)^{t-1} \cdot \left( \frac{\sqrt{\alpha_1(\eta)}}{2} + \frac{\sqrt{\alpha_1(\eta) - 4\beta(\eta)}}{2} \right)^{2t} \cdot \sum_{k=2}^d E[(u_k^T w_0)^2].$$

Finally, from (65), we have

$$\sum_{k=2}^d E[w_t^T P M_k P w_t] \leq 4K \left( 1 + \frac{4\eta^2 K}{\alpha_1(\eta) - 4\beta(\eta)} \right)^{t-1} \cdot \left( \frac{\sqrt{\alpha_1(\eta)}}{2} + \frac{\sqrt{\alpha_1(\eta) - 4\beta(\eta)}}{2} \right)^{2t} \cdot \sum_{k=2}^d E[(u_k^T w_0)^2]. \quad (79)$$

This completes the proof of the first statement.

Next, from  $\alpha_2(\eta) = 4\beta(\eta) \geq \alpha_k(\eta)$  for  $k \geq 2$  and (92) in Lemma A.4,

$$\sum_{k=2}^d p_m(\alpha_k(\eta), \beta(\eta)) E[(u_k^T w_0)^2] \leq p_m(\alpha_2(\eta), \beta(\eta)) \cdot \sum_{k=2}^d E[(u_k^T w_0)^2]. \quad (80)$$

Also, using (91) and (92) in Lemma A.4 and (79), we have

$$\begin{aligned}
 & 4\eta^2 \sum_{k=2}^d \sum_{r=1}^{m-1} q_{m-r-1}(\alpha_k(\eta), \beta(\eta)) E[w_r^T P M_k P w_r] \\
 & \leq \frac{16\eta^2 K}{\alpha_1(\eta) - 4\beta(\eta)} \sum_{r=1}^{m-1} \left( 1 + \frac{4\eta^2 K}{\alpha_1(\eta) - 4\beta(\eta)} \right)^{r-1} \cdot \left( \frac{\sqrt{\alpha_1(\eta)}}{2} + \frac{\sqrt{\alpha_1(\eta) - 4\beta(\eta)}}{2} \right)^{2m} \cdot \sum_{k=2}^d E[(u_k^T w_0)^2] \\
 & \leq 4 \left[ \left( 1 + \frac{4\eta^2 K}{\alpha_1(\eta) - 4\beta(\eta)} \right)^{m-1} - 1 \right] \cdot \left( \frac{\sqrt{\alpha_1(\eta)}}{2} + \frac{\sqrt{\alpha_1(\eta) - 4\beta(\eta)}}{2} \right)^{2m} \cdot \sum_{k=2}^d E[(u_k^T w_0)^2].
 \end{aligned}$$

Since  $0 < \frac{4\eta^2 K m}{\alpha_1(\eta) - \beta(\eta)} < 1$ , using that  $\exp(x) \leq 1 + 2x$  for  $x \in [0, 1]$  we have

$$\left( 1 + \frac{4\eta^2 K}{\alpha_1(\eta) - 4\beta(\eta)} \right)^{m-1} - 1 \leq \left( 1 + \frac{4\eta^2 K}{\alpha_1(\eta) - 4\beta(\eta)} \right)^m - 1 \leq \exp\left(\frac{4\eta^2 K m}{\alpha_1(\eta) - 4\beta(\eta)}\right) - 1 \leq \frac{8\eta^2 K m}{\alpha_1(\eta) - 4\beta(\eta)},$$

leading to

$$\begin{aligned}
 4\eta^2 \sum_{k=2}^d \sum_{r=1}^{m-1} q_{m-r-1}(\alpha_k(\eta), \beta(\eta)) E[w_r^T P M_k P w_r] & \leq \frac{32\eta^2 K m}{\alpha_1(\eta) - 4\beta(\eta)} \cdot \left( \frac{\sqrt{\alpha_1(\eta)}}{2} + \frac{\sqrt{\alpha_1(\eta) - 4\beta(\eta)}}{2} \right)^{2m} \\
 & \cdot \sum_{k=2}^d E[(u_k^T w_0)^2]. \quad (81)
 \end{aligned}$$

Using (80), (81) for Lemma 3.5, we finally have

$$\sum_{k=2}^d E[(u_k^T w_m)^2] \leq \left[ p_m(\alpha_2(\eta), \beta(\eta)) + \frac{32\eta^2 K m}{\alpha_1(\eta) - 4\beta(\eta)} \cdot \left( \frac{\sqrt{\alpha_1(\eta)}}{2} + \frac{\sqrt{\alpha_1(\eta) - 4\beta(\eta)}}{2} \right)^{2m} \right] \cdot \sum_{k=2}^d E[(u_k^T w_0)^2]. \quad (82)$$

Lastly, using Lemma 3.5 for  $k = 1$ , we have

$$E[(u_1^T w_m)^2] = p_m(\alpha_1(\eta), \beta(\eta))E[(u_1^T w_0)^2] + 4\eta^2 \sum_{r=1}^{m-1} q_{m-r-1}(\alpha_1(\eta), \beta(\eta))E[w_r^T P M_1 P w_r].$$

Since  $P M_k P$  is positive semi-definite and  $q_t(\alpha_1(\eta), \beta(\eta)) \geq 0$  for  $1 \leq t < m$  by (91) in Lemma A.4, we have

$$E[(u_1^T w_m)^2] \geq p_m(\alpha_1(\eta), \beta(\eta))E[(u_1^T w_0)^2]. \quad (83)$$

Also, from  $\alpha_1(\eta) > \alpha_2(\eta) = 4\beta(\eta)$  and (90) in Lemma A.4, we have

$$p_m(\alpha_1(\eta), \beta(\eta)) \geq \frac{1}{4} \left( \frac{\sqrt{\alpha_1(\eta)}}{2} + \frac{\sqrt{\alpha_1(\eta) - 4\beta(\eta)}}{2} \right)^{2m}. \quad (84)$$

Using (82), (83) and (84), we eventually obtain

$$\frac{\sum_{k=2}^d E[(u_k^T w_m)^2]}{E[(u_1^T w_m)^2]} \leq \left[ \frac{p_m(\alpha_2(\eta), \beta(\eta))}{p_m(\alpha_1(\eta), \beta(\eta))} + \frac{128\eta^2 K m}{\alpha_1(\eta) - 4\beta(\eta)} \right] \cdot \frac{\sum_{k=2}^d E[(u_k^T w_0)^2]}{E[(u_1^T w_0)^2]},$$

which completes the proof. □

*Proof of Lemma 3.7.* Using the conditions on  $m$  and  $|S|$ , we have

$$0 \leq \frac{4\eta^2 K m}{\alpha_1(\eta) - 4\beta(\eta)} \leq \frac{1}{128}. \quad (85)$$

Also, from

$$p_m(\alpha_2(\eta), \beta(\eta)) = (\beta(\eta))^m, \quad p_m(\alpha_1(\eta), \beta(\eta)) \geq \frac{1}{4} \left( \frac{\sqrt{\alpha_1(\eta)}}{2} + \frac{\sqrt{\alpha_1(\eta) - 4\beta(\eta)}}{2} \right)^{2m}$$

and the choice of  $m$ , we have

$$\begin{aligned} \frac{p_m(\alpha_2(\eta), \beta(\eta))}{p_m(\alpha_1(\eta), \beta(\eta))} &\leq 4 \cdot \left( \frac{\sqrt{4\beta(\eta)}}{\sqrt{\alpha_1(\eta)} + \sqrt{\alpha_1(\eta) - 4\beta(\eta)}} \right)^{2m} \\ &= 4 \cdot \left( 1 - \frac{\sqrt{\alpha_1(\eta)} - \sqrt{4\beta(\eta)} + \sqrt{\alpha_1(\eta) - 4\beta(\eta)}}{\sqrt{\alpha_1(\eta)} + \sqrt{\alpha_1(\eta) - 4\beta(\eta)}} \right)^{2m} \\ &= 4 \cdot \left( 1 - \frac{\eta\lambda_1\Delta + \sqrt{\eta\lambda_1\Delta(2(1-\eta) + \eta(\lambda_1 + \lambda_2))}}{1 - \eta + \eta\lambda_1 + \sqrt{\eta\lambda_1\Delta(2(1-\eta) + \eta(\lambda_1 + \lambda_2))}} \right)^{2m} \\ &\leq 4 \cdot \exp \left( -2 \frac{\eta\lambda_1\Delta + \sqrt{\eta\lambda_1\Delta(2(1-\eta) + \eta(\lambda_1 + \lambda_2))}}{1 - \eta + \eta\lambda_1 + \sqrt{\eta\lambda_1\Delta(2(1-\eta) + \eta(\lambda_1 + \lambda_2))}} m \right) \\ &\leq \frac{1}{2}. \end{aligned} \quad (86)$$

Therefore, using (85) and (86) in Lemma 3.6, we finally have

$$\frac{\sum_{k=2}^d E[(u_k^T w_m)^2]}{E[(u_1^T w_m)^2]} \leq \left( \frac{p_m(\alpha_2(\eta), \beta(\eta))}{p_m(\alpha_1(\eta), \beta(\eta))} + \frac{128\eta^2 K m}{\alpha_1(\eta) - 4\beta(\eta)} \right) \left( \frac{\sum_{k=2}^d E[(u_k^T w_0)^2]}{E[(u_1^T w_0)^2]} \right) \leq \frac{3}{4} \left( \frac{\sum_{k=2}^d E[(u_k^T w_0)^2]}{E[(u_1^T w_0)^2]} \right),$$

which completes the proof. □

*Proof of Theorem 3.8.* By repeatedly applying Lemma 3.7, we have

$$\frac{\sum_{k=2}^d E[(u_k^T \tilde{w}_\tau)^2]}{E[(u_1^T \tilde{w}_\tau)^2]} \leq \left(\frac{3}{4}\right)^\tau \frac{\sum_{k=2}^d E[(u_k^T \tilde{w}_0)^2]}{E[(u_1^T \tilde{w}_0)^2]} = \left(\frac{3}{4}\right)^\tau \tilde{\theta}_0.$$

Since  $\tau = \lceil \log(\tilde{\theta}_0/\epsilon) / \log(4/3) \rceil$ , we have

$$\tau \log\left(\frac{3}{4}\right) \leq \log\left(\frac{\epsilon}{\tilde{\theta}_0}\right),$$

resulting in

$$\frac{\sum_{k=2}^d E[(u_k^T \tilde{w}_\tau)^2]}{E[(u_1^T \tilde{w}_\tau)^2]} \leq \epsilon.$$

□



## A.2 Technical Lemmas

**Lemma A.2.** *Let  $w$  be a vector in  $\mathbb{R}^d$  and let  $M$  be a  $d \times d$  symmetric matrix. Then, we have*

$$w^T M w \leq \|M\| \|w\|^2.$$

*Proof.* By the cyclic property of the trace, we have

$$w^T M w = \text{Tr}[w^T M w] = \text{Tr}[M w w^T].$$

Since  $w w^T$  is positive semi-definite, we have

$$\text{Tr}[M w w^T] \leq \|M\| \text{Tr}[w w^T].$$

Again, by the cyclic property of the trace, we finally have

$$w^T M w \leq \|M\| \text{Tr}[w w^T] = \|M\| \text{Tr}[w^T w] = \|M\| \|w\|^2. \quad \square$$

**Lemma A.3.** *Let  $A_i$  and  $B_i$  be  $d \times d$  matrices for  $i = 0, \dots, t-1$ . Then, we have*

$$\prod_{i=t-1}^0 (A_i + B_i) = (A_{t-1} + B_{t-1})(A_{t-2} + B_{t-2}) \cdots (A_0 + B_0) = \prod_{i=t-1}^0 A_i + \sum_{i=0}^{t-1} \left[ \prod_{j=t-1}^{i+1} (A_j + B_j) B_i \prod_{k=i-1}^0 A_k \right]. \quad (87)$$

*Proof.* We prove the statement by induction. For  $t = 1$ , we have

$$\prod_{i=0}^0 A_i + \sum_{i=0}^0 \left[ \prod_{j=0}^{i+1} (A_j + B_j) B_i \prod_{k=i-1}^0 A_k \right] = A_0 + \left[ \prod_{j=0}^1 (A_j + B_j) B_0 \prod_{k=-1}^0 A_k \right] = A_0 + B_0,$$

which proves the base case. Next, suppose that we have (87) for  $t-2$ . Then, we have

$$\begin{aligned} \prod_{i=t-1}^0 (A_i + B_i) &= (A_{t-1} + B_{t-1}) \prod_{i=t-2}^0 (A_i + B_i) \\ &= (A_{t-1} + B_{t-1}) \left( \prod_{i=t-2}^0 A_i + \sum_{i=0}^{t-2} \left[ \prod_{j=t-2}^{i+1} (A_j + B_j) B_i \prod_{k=i-1}^0 A_k \right] \right) \\ &= \prod_{i=t-1}^0 A_i + B_{t-1} \prod_{i=t-2}^0 A_i + \left( \sum_{i=0}^{t-2} \left[ \prod_{j=t-1}^{i+1} (A_j + B_j) B_i \prod_{k=i-1}^0 A_k \right] \right) \\ &= \prod_{i=t-1}^0 A_i + \sum_{i=0}^{t-1} \left[ \prod_{j=t-1}^{i+1} (A_j + B_j) B_i \prod_{k=i-1}^0 A_k \right]. \end{aligned}$$

This completes the proof. □

**Lemma A.4.** *Let  $x_t$  be a sequence of real numbers such that*

$$x_t = (\alpha - \beta)x_{t-1} - \beta(\alpha - \beta)x_{t-2} + \beta^3 x_{t-3} + L_{t-1} + \beta L_{t-2}$$

for  $t \geq 3$  and  $x_0 = L_0$ ,  $x_1 = \frac{\alpha}{4} L_0$ ,  $x_2 = \left(\frac{\alpha}{2} - \beta\right)^2 L_0 + L_1$ . Then, we have

$$x_t = p_t(\alpha, \beta) L_0 + \sum_{r=1}^{t-1} q_{t-r-1}(\alpha, \beta) L_r. \quad (88)$$

Moreover, for  $t \geq 0$ , we have

- if  $0 \leq \alpha = 4\beta$ ,

$$p_t(4\beta, \beta) = \beta^t \geq 0, \quad q_t(4\beta, \beta) = (t+1)^2 \beta^t \geq 0, \quad (89)$$

- if  $0 \leq 4\beta < \alpha$ ,

$$p_t(\alpha, \beta) = \left[ \frac{1}{2} \left( \frac{\sqrt{\alpha}}{2} + \frac{\sqrt{\alpha - 4\beta}}{2} \right)^t + \frac{1}{2} \left( \frac{\sqrt{\alpha}}{2} - \frac{\sqrt{\alpha - 4\beta}}{2} \right)^t \right]^2 > p_t(4\beta, \beta) \geq 0, \quad (90)$$

$$q_t(\alpha, \beta) = \frac{1}{\alpha - 4\beta} \left[ \left( \frac{\sqrt{\alpha}}{2} + \frac{\sqrt{\alpha - 4\beta}}{2} \right)^{t+1} - \left( \frac{\sqrt{\alpha}}{2} - \frac{\sqrt{\alpha - 4\beta}}{2} \right)^{t+1} \right]^2 > q_t(4\beta, \beta) \geq 0, \quad (91)$$

- if  $0 \leq \alpha < 4\beta$ ,

$$p_t(\alpha, \beta) \leq p_t(4\beta, \beta), \quad q_t(\alpha, \beta) \leq q_t(4\beta, \beta). \quad (92)$$

*Proof.* It is easy to check that  $x_0$ ,  $x_1$ , and  $x_2$  satisfy (88). Suppose that (88) holds for  $t-1, t-2, t-3$ . Then, we have

$$\begin{aligned} x_t &= (\alpha - \beta)x_{t-1} - \beta(\alpha - \beta)x_{t-2} + \beta^3 x_{t-3} + L_{t-1} + \beta L_{t-2} \\ &= p_t(\alpha, \beta)L_0 + L_{t-1} + \alpha L_{t-2} + (\alpha - \beta)^2 L_{t-3} + \sum_{r=1}^{t-4} q_{t-r-1}(\alpha, \beta)L_r \\ &= p_t(\alpha, \beta)L_0 + \sum_{r=1}^{t-1} q_{t-r-1}(\alpha, \beta)L_r. \end{aligned}$$

Therefore, (88) holds by induction.

Next, we prove (89), (90), (91) and (92). The characteristic equation of (9) is

$$r^3 - (\alpha - \beta)r^2 + \beta(\alpha - \beta)r - \beta^3 = 0. \quad (93)$$

If  $0 \leq \alpha = 4\beta$ , (93) has a cube root of  $r = \beta$ . From initial conditions (11) and (12), we obtain

$$p_t(4\beta, \beta) = \beta^t \geq 0, \quad q_t(4\beta, \beta) = (t+1)^2 \beta^t \geq 0. \quad (94)$$

If  $0 \leq 4\beta < \alpha$ , the roots of (93) are

$$r = \beta, \frac{\alpha - 2\beta}{2} + \frac{\sqrt{\alpha^2 - 4\alpha\beta}}{2}, \frac{\alpha - 2\beta}{2} - \frac{\sqrt{\alpha^2 - 4\alpha\beta}}{2}.$$

With initial conditions (11), we obtain

$$p_t(\alpha, \beta) = \frac{1}{4} \left( \frac{\alpha - 2\beta}{2} + \frac{\sqrt{\alpha^2 - 4\alpha\beta}}{2} \right)^t + \frac{1}{4} \left( \frac{\alpha - 2\beta}{2} - \frac{\sqrt{\alpha^2 - 4\alpha\beta}}{2} \right)^t + \frac{1}{2} \beta^t$$

Using the fact that  $\alpha > 4\beta$  and the arithmetic-geometric mean inequality, we have

$$p_t(\alpha, \beta) > \beta^t \geq 0.$$

Moreover, we can further write  $p_t(\alpha, \beta)$  as

$$p_t(\alpha, \beta) = \left[ \frac{1}{2} \left( \frac{\sqrt{\alpha}}{2} + \frac{\sqrt{\alpha - 4\beta}}{2} \right)^t + \frac{1}{2} \left( \frac{\sqrt{\alpha}}{2} - \frac{\sqrt{\alpha - 4\beta}}{2} \right)^t \right]^2$$

by expanding this expression.

On the other hand, using (12), we have

$$\begin{aligned} q_t(\alpha, \beta) &= \frac{1}{\alpha - 4\beta} \left[ \left( \frac{\alpha - 2\beta}{2} + \frac{\sqrt{\alpha^2 - 4\alpha\beta}}{2} \right)^{t+1} + \left( \frac{\alpha - 2\beta}{2} - \frac{\sqrt{\alpha^2 - 4\alpha\beta}}{2} \right)^{t+1} - 2\beta^{t+1} \right] \\ &= \frac{1}{\alpha - 4\beta} \left[ \left( \frac{\sqrt{\alpha}}{2} + \frac{\sqrt{\alpha - 4\beta}}{2} \right)^{t+1} - \left( \frac{\sqrt{\alpha}}{2} - \frac{\sqrt{\alpha - 4\beta}}{2} \right)^{t+1} \right]^2 \geq 0. \end{aligned}$$

Using the fact that  $A^{t+1} - B^{t+1} = (A - B)(A^t + A^{t-1}B + \dots + B^t)$  for any  $A, B \in \mathbb{R}$ , we have

$$q_t(\alpha, \beta) = \left[ \sum_{i=0}^t \left( \frac{\sqrt{\alpha}}{2} + \frac{\sqrt{\alpha - 4\beta}}{2} \right)^i \left( \frac{\sqrt{\alpha}}{2} - \frac{\sqrt{\alpha - 4\beta}}{2} \right)^{t-i} \right]^2.$$

Again, using the arithmetic-geometric mean inequality and the fact that  $\alpha > 4\beta$ , we have

$$q_t(\alpha, \beta) \geq \left[ (t+1) \left( \frac{\sqrt{\alpha}}{2} + \frac{\sqrt{\alpha - 4\beta}}{2} \right)^{t/2} \left( \frac{\sqrt{\alpha}}{2} - \frac{\sqrt{\alpha - 4\beta}}{2} \right)^{t/2} \right]^2 = (t+1)^2 \beta^t = q_t(4\beta, \beta).$$

If  $0 \leq \alpha < 4\beta$ , the roots of (93) are

$$r = \beta, \frac{\alpha - 2\beta}{2} + \frac{\sqrt{4\alpha\beta - \alpha^2}}{2}i, \frac{\alpha - 2\beta}{2} - \frac{\sqrt{4\alpha\beta - \alpha^2}}{2}i.$$

Setting

$$\cos \theta_p = \frac{\alpha - 2\beta}{2\beta}, \quad \sin \theta_p = \frac{\sqrt{4\alpha\beta - \alpha^2}}{2\beta}$$

it is easy to verify that

$$\begin{aligned} p_t(\alpha, \beta) &= \frac{1}{4}\beta^t \left[ \cos \theta_p + i \sin \theta_p \right]^t + \frac{1}{4}\beta^t \left[ \cos \theta_p - i \sin \theta_p \right]^t + \frac{1}{2}\beta^t \\ &= \frac{1}{4}(e^{i\theta t} + e^{-i\theta t})\beta^t + \frac{1}{2}\beta^t \\ &= \frac{1}{4}|e^{i\theta t} + e^{-i\theta t}|\beta^t + \frac{1}{2}\beta^t \\ &\leq \frac{1}{4}(|e^{i\theta t}| + |e^{-i\theta t}|)\beta^t + \frac{1}{2}\beta^t \\ &= \beta^t. \end{aligned}$$

Moreover, with

$$\cos \theta_q = \frac{\alpha - 2\beta}{2\beta}, \quad \sin \theta_q = \frac{\sqrt{4\alpha\beta - \alpha^2}}{2\beta}, \quad \cos \phi_q = 1 - \frac{\alpha}{2\beta}, \quad \sin \phi_q = -\frac{\sqrt{4\alpha\beta - \alpha^2}}{2\beta},$$

it can be seen by using elementary calculus that

$$q_t(\alpha, \beta) = \left[ \frac{2\beta}{4\beta - \alpha} + \frac{2\beta}{4\beta - \alpha} \cos(\phi_q + t\theta_q) \right] \beta^t. \quad (95)$$

Let

$$Q(t) = \frac{q_t(4\beta, \beta) - q_t(\alpha, \beta)}{\beta^t}.$$

Then, from (9) and (11), we have

$$Q(0) = 0, \quad Q(1) = \frac{4\beta - \alpha}{\beta}, \quad Q(2) = \frac{(4\beta - \alpha)(2\beta + \alpha)}{\beta^2}, \quad Q(3) = \frac{(\alpha^2 + 4\beta^2)(4\beta - \alpha)}{\beta^3} \quad (96)$$

resulting in

$$Q(2) - Q(0) = \frac{(4\beta - \alpha)(2\beta + \alpha)}{\beta^2} \geq 0, \quad Q(3) - Q(1) = \frac{(\alpha^2 + 3\beta^2)(4\beta - \alpha)}{\beta^3} \geq 0. \quad (97)$$

In order to show  $Q(t) \geq 0$  for  $t \geq 0$ , we prove  $Q(t+2) - Q(t) \geq 0$  for  $t \geq 0$ . Using (94), (95) and standard trigonometric equalities, it follows that

$$Q(t+2) - 2Q(t) + Q(t-2) = 8 + \frac{2\alpha}{\beta} \cos(\phi_q + t\theta_q).$$

In turn, we have

$$\begin{aligned} Q(t+2) - Q(t) &= Q(t) - Q(t-2) + 8 + \frac{2\alpha}{\beta} \cos(\phi_q + t\theta_q) \\ &\geq Q(t) - Q(t-2) + 8 - \frac{2\alpha}{\beta} \\ &= Q(t) - Q(t-2) + \frac{2(4\beta - \alpha)}{\beta} \\ &\geq Q(t) - Q(t-2). \end{aligned} \quad (98)$$

From (96), (97), and (98), for  $t \geq 0$ , we obtain  $Q(t) \geq 0$  implying

$$q_t(\alpha, \beta) \leq q_t(4\beta, \beta).$$

□

**Lemma A.5.** *If  $\alpha > 4\beta \geq 0$ , then for  $0 \leq t_1 < t_2$ , we have*

$$q_{t_1}(\alpha, \beta) \cdot q_{t_2}(\alpha, \beta) \leq \left( \frac{1}{\alpha - 4\beta} \right) q_{t_1+t_2+1}(\alpha, \beta).$$

*Proof.* From (91) in Lemma A.4, we have

$$\begin{aligned} q_{t_1}(\alpha, \beta) \cdot q_{t_2}(\alpha, \beta) &= \left( \frac{1}{\alpha - 4\beta} \right)^2 \left[ \left( \frac{\sqrt{\alpha}}{2} + \frac{\sqrt{\alpha - 4\beta}}{2} \right)^{t_1+1} - \left( \frac{\sqrt{\alpha}}{2} - \frac{\sqrt{\alpha - 4\beta}}{2} \right)^{t_1+1} \right]^2 \\ &\quad \cdot \left[ \left( \frac{\sqrt{\alpha}}{2} + \frac{\sqrt{\alpha - 4\beta}}{2} \right)^{t_2+1} - \left( \frac{\sqrt{\alpha}}{2} - \frac{\sqrt{\alpha - 4\beta}}{2} \right)^{t_2+1} \right]^2. \end{aligned}$$

Since

$$0 \leq \frac{\sqrt{\alpha}}{2} - \frac{\sqrt{\alpha - 4\beta}}{2} < \frac{\sqrt{\alpha}}{2} + \frac{\sqrt{\alpha - 4\beta}}{2},$$

we have

$$\begin{aligned} &\left[ \left( \frac{\sqrt{\alpha}}{2} + \frac{\sqrt{\alpha - 4\beta}}{2} \right)^{t_1+1} - \left( \frac{\sqrt{\alpha}}{2} - \frac{\sqrt{\alpha - 4\beta}}{2} \right)^{t_1+1} \right] \left[ \left( \frac{\sqrt{\alpha}}{2} + \frac{\sqrt{\alpha - 4\beta}}{2} \right)^{t_2+1} - \left( \frac{\sqrt{\alpha}}{2} - \frac{\sqrt{\alpha - 4\beta}}{2} \right)^{t_2+1} \right] \\ &= \left( \frac{\sqrt{\alpha}}{2} + \frac{\sqrt{\alpha - 4\beta}}{2} \right)^{t_1+t_2+2} - \left( \frac{\sqrt{\alpha}}{2} - \frac{\sqrt{\alpha - 4\beta}}{2} \right)^{t_1+1} \left( \frac{\sqrt{\alpha}}{2} + \frac{\sqrt{\alpha - 4\beta}}{2} \right)^{t_2+1} \\ &\quad - \left( \frac{\sqrt{\alpha}}{2} + \frac{\sqrt{\alpha - 4\beta}}{2} \right)^{t_1+1} \left( \frac{\sqrt{\alpha}}{2} - \frac{\sqrt{\alpha - 4\beta}}{2} \right)^{t_2+1} + \left( \frac{\sqrt{\alpha}}{2} - \frac{\sqrt{\alpha - 4\beta}}{2} \right)^{t_1+t_2+2} \\ &\leq \left( \frac{\sqrt{\alpha}}{2} + \frac{\sqrt{\alpha - 4\beta}}{2} \right)^{t_1+t_2+2} - \left( \frac{\sqrt{\alpha}}{2} - \frac{\sqrt{\alpha - 4\beta}}{2} \right)^{t_1+t_2+2}. \end{aligned}$$

Therefore, we have

$$\begin{aligned} q_{t_1}(\alpha, \beta) \cdot q_{t_2}(\alpha, \beta) &\leq \left( \frac{1}{\alpha - 4\beta} \right)^2 \left[ \left( \frac{\sqrt{\alpha}}{2} + \frac{\sqrt{\alpha - 4\beta}}{2} \right)^{t_1+t_2+2} - \left( \frac{\sqrt{\alpha}}{2} - \frac{\sqrt{\alpha - 4\beta}}{2} \right)^{t_1+t_2+2} \right]^2 \\ &= \left( \frac{1}{\alpha - 4\beta} \right) q_{t_1+t_2+1}(\alpha, \beta). \end{aligned}$$

This completes the proof. □
